# Supplementary material
Source: PubMed Central journal article supplement (PMC6954732)
Supplement: IMM-159-231-s001.pdf [file IMM-159-231-s001.pdf]

Wu et al., **Ectopic germline recombination activity of the widely used Foxp3-YFP-Cre knock-in mouse: a case report in the generation of Treg-specific InsR knockout mice**  
*Supporting information*

**Annotated sequence of a floxed allele near Exon 4 of *Insr*** (WT intron, Cloning remnant, loxP, Exon4)

TCTCAAAAACAAGCTAAAAGGCTCCTGAAGAATGACACCCAAAGTTGACCTCTGATCTCCATAAAGGTGTGT  
ATGTACCCCCAACACACACACACACACACACACACACACACACACACACACACACACACGCTACACATCATATGCATATGAA  
CATAAAGTTCTATCATGTGATCAATGATTCTATCAACCGTGCCTAGAGACTCCAAGACAAACTTTATAGGACT  
AGTCGACCTGCAGCCAAGCTAGCCTGGCTGGACGTAACCTCCTCTTCAGACCTATAACTTCGTATAGCAT  
ACATTATACGAAGTTATATTAAGGGTTATTGAATATGATCGGAATTCCTCGAGTCTAGTGAGGTGACAGGGTT  
GGTAAATGTGGACTTCAGTTTGTCTTAGCACCCTGGGAAAGGTGGACATGGTGGTCTGTGCTTGTTA  
TACCAGCACTGGAGAGGTGTGGTGTCTGTGATCTGCCCTGTGCAGGGAATGAAGGAAGTTTTTATACCA  
GGAAAGGAATTTGTGTGTTTGTGTGTATGCAGCTATTTGTGAGTGGGTGTAGGGAGATCAGAGGACAACC  
TCAGATATTATTCTCAGAATTTACCTACTTTCTTTGTGATAGGGTCTCCCAGTGACCCTGAGCCTGACCTAT  
TAGGCTAGGCTACCTGATCAGCAAACCCAGGATTCTCTCTCCTTCCTCAGTACTACTCTTACCAATATCTAA  
CAGTGTGTTGATATTTCCAAGAAAACCTTTCATTGCGTATGATTTATTTTTATGCGTGTGTGTGTGTGTGTGT  
GTGTGTGTGTGTGTGCGTGCAAGCGCACGCGCGCACAGGGTTAGTATGTGGTGCTCAGTTCTCAGAACTT  
GCTTTCCTTCTTTCACTTTGTTGGGCCAGGGATTGAAGTTCAGGTTAGCAGGCTTGGCTGCAAGCAGGTAC  
CTTTACCCTATGAGCTGTCTTCCAGCCAATGCCTGACATTTTAGGTGGGCTATAGGGTTCAACTGAGGT  
TCTCATATTTATGAGGTGAATATTCCATGGTCTGAACACTCCCTTAAACCCTGGGCAATGAATTTAAGGGGA  
TAATTGGCCATTTAAAACCTGTAGGAGAAGGTTGACAATGCCTGGGAATAATTTTATTGTGGCAATTTAGAG  
ATGAGATGGTGTGTTGGTACTGAGCACCAGTTGGGAATCTGGCTCTGCATCGTATACTGCCCAAGGTTGCCTC  
ATGACCACTGTGAAGACATATTTGGTGTCAAATATTTGGAATACTATATCAGTGAACCTTCTCTTGCTGTGATA  
AACACTCTGACCAAAGGCAGCTTAGGGGAGGACAAGGTTTGTTCAGCTTATACTGCTTGGTTACATTCT  
GTCACAGAGTGAAGTCAAATAGAAACATAAAGCAGAAACCAAAACAGAGTTTCTCAACCTTCCTAGCAC  
GAACCTTTTATACAGATCCTCATGTTGTAATGACCTATAACCATAAAATTATTTATCTGCTACTTCATAAGTGTA  
GTTTTGCTACTGTTATGAGTCATAATGTTAATATCTGATAGGTAGGATCTCTGATATGTGACCAACAGAGGGG  
TAGCAGTGTCTAGGCTGAAAACCACTGCCATAGAGCAGTGATGCTAGTTGACTCTGTTTCTAGCTCATGTG  
CAGCTAGCTTTCTCAGATAGACCAGGCCACCTGCCTTGGAATGGCCACCCACAGTGGGCTGGACCCTC  
CCCCATCAATCAACAATCGAGATAACTCCCCACAGTATAGTCATGGACCAATCTGATTTAGGCAATTCCTCAA  
CTGAGATCCCCCTCATGATGACTCTAGGCTATATCCTGCTGACAGTTAAAAGTTAGCTAGCTCAACTGCTGA  
GCTCAGCACATCCACTTTAGAGTAACAGACTGAGGTTGCCACTGGGTTCTGTGAAGAGTGTGTATTCCA  
AATGACGGGGTGAGGGAACCCCTGTGCACCTCATTGATCTCTTTGCCTGTGCTCCACTCTCAGCTTGATGTG  
CACCCATGTCTGGACCCTGCCCTAAGGTCTGCCAAATCCTCGAAGGTGAGAAGACCATTGATTCTGTG  
ACATCTGCCAGGAGCTCCGAGGCTGCACTGTGATCAACGGTAGCCTGATCATCAACATCCGAGGGGGCA  
GTGAGTATTTTGGAGCATCCCCACTTCTATGAGCTGTGAGCAGGGAAGCTCGAGATAACTTCGTATAGC  
ATACATTATACGAAGTTATGCACAGCTCAGGGTATTCCACACATTCCCCTCTTAACCTTTCACGGCCAAATTT  
ACTTTGTTCTGTGGTCTCAGCTATTGAGGCTGAGGCAGGAGGATTGCTTTAATCTAGCAAGTTCAGT  
CTAGCCTAGATGACATAATCTTGTCCAAGAAAATAAAACAACATAACATGCAAAGTGACACATCCTTTAGTGG  
CCCCAAATGAGAGACTTATACCAGGAGTTGCCCTTAAATCCAAATGAAAATTTTATGGCTCTACCTCTGCC  
TGAAATTTCTATTTTGAATCTGCAGCAGGAATCTCTATTCTTTATTTTTATGTGTATGAGTGTGTTTGTCTGG  
GTATATGTATATACATGGTGTATATGAGGTGTCCACAAAAAAGAGGGTATATAATACCCTGGAAGTGCAGTTA  
GAGATGACTGTGAGTTACCATGTGGATGTGGGGACTGAACCCAGGCCCTCTGTGATAGCACCTGATTCTC  
GTAATTAATTCT

### PCR primers

**The primers shown in Fig 1B. Designed by PMID 9844629**

Forward primer **GATGTGCACCCCATGTCTG**

Reverse primer **CTGAATAGCTGAGACCACAG**

Product sizes

wt allele = 279 bp

floxed allele = 319 bp

**The primers shown in Fig 3A. New PCR primer that give 3 distinct products**

Forward primer **ACCGTGCCTAGAGACTCCAAGAC**

Reverse primer **CTGAATAGCTGAGACCACAG**

Product sizes

wt allele = 1983 bp

floxed allele = 2150 bp

recombined allele = 209 bp

### qPCR Primers for estimating relative ectopic recombination (shown in Fig 4A)

**Primers only amplify wt allele (product = 92 bp)**

**ACAAACTTTATAGGACTAGTGAGGT**

**ACCACCATGTCCACCTTTCCC**

**Primers only amplify floxed allele (product = 182 bp)**

**GCTTGGCTGGACGTAAACTCCT**

**ACCACCATGTCCACCTTTCCCA**

**Primers only amplify recombined allele (product = 209 bp)**

**ACCGTGCCTAGAGACTCCAAGAC**

**CTGAATAGCTGAGACCACAG**

**Housekeeping gene 1: *Ccr5***

CAGGCAACAGAGACTCTTGG, TCATGTTCTCCTGTGGATCG

**Housekeeping gene 2: *Il10rb***

ATGATTCCACCCCTGAGA, GAGCTGTGAAAGTCAGGTTTCG

**qPCR Primers for assessing *Insr* mRNA**

***Insr***: TGTGACATCTGCCAGGAGCT, GCATAGGAGCGGCGGATCTTTAG

***Sdha***: CCTAAACATGCAGAAGTCGATGC, GCCTTCTTGCAATACACTCCCC

***Rpl13a***: CTCAAGGTTGTTCCGGCTGAA, CTGTCACTGCCTGGTACTTCCA

**Antibodies for FACSsorting**

| <b>Marker</b>         | <b>Fluorochrome</b> | <b>Company</b> | <b>Catalogue</b> | <b>Clone</b> |
|-----------------------|---------------------|----------------|------------------|--------------|
| NK1.1                 | PE                  | BD             | 557391           | PK136        |
| CD3                   | BV605               | BioLegend      | 100237           | 17A2         |
| CD19                  | APC                 | BD             | 550992           | 1D3          |
| CD4                   | eF450               | eBioscience    | 48-0041-82       | GK1.5        |
| CD8a                  | PE-Cy7              | eBioscience    | 25-0081-82       | 53-6.7       |
| Fixable viability Dye | eF780               | eBioscience    | 65-0865-14       |              |
